# Supplementary material for: The Safety and Efficacy of Phage Therapy: A Systematic Review of Clinical and Safety Trials
Source: MDPI journal article supplement (doi:10.3390/antibiotics11101340), 2022-09-30
Supplement: s1 [file s1]

## Supplementary file S4: critical appraisal

Critical appraisal of manuscripts was performed using the Joanna Briggs Institute suite of critical appraisal tools available from <https://joannabriggs.org/critical-appraisal-tools> [accessed 22/12/2021].

### Clinical trials

| Author<br>(year)                                                                                                           | True randomisation? | Allocation to treatment groups concealed? | Treatment groups similar at baseline? | Participants blind to assignment? | Treatment givers blind to assignment? | Outcome assessors blind to assignment? | Treatment groups treated identically - other than the intervention | Complete follow up? | Participants analysed in allocated groups? | Consistent outcome measurement? | Reliable outcome measurement? | Appropriate statistical analysis? | Was the trial design appropriate? | Comment                                                                                                                                                                           |
|----------------------------------------------------------------------------------------------------------------------------|---------------------|-------------------------------------------|---------------------------------------|-----------------------------------|---------------------------------------|----------------------------------------|--------------------------------------------------------------------|---------------------|--------------------------------------------|---------------------------------|-------------------------------|-----------------------------------|-----------------------------------|-----------------------------------------------------------------------------------------------------------------------------------------------------------------------------------|
| Bryant et al. (1965), [38]<br><br>United States<br><br>Single-centre, randomised, double-blinded, placebo-controlled trial | Y                   | Y                                         | Y                                     | Y                                 | Y                                     | Y                                      | Y                                                                  | Y                   | Y                                          | Y                               | N*                            | Y                                 | Y                                 | *Changes in boil frequency, character and size could reflect the activity of other pathogens.                                                                                     |
| Wittig et al. (1966), [36]<br><br>United States<br><br>Single-centre, randomised, double-blinded, placebo-controlled trial | U                   | U                                         | Y                                     | U                                 | U                                     | Y                                      | Y                                                                  | Y                   | Y                                          | Y                               | N*                            | Y                                 | Y                                 | *The trial was conducted in winter. Symptom cards were used for recording. The respiratory symptoms recorded in either group could have been caused by a wide range of pathogens. |

|                                                                                                                                         |    |   |   |   |   |   |   |   |   |   |   |   |   |                                                                       |
|-----------------------------------------------------------------------------------------------------------------------------------------|----|---|---|---|---|---|---|---|---|---|---|---|---|-----------------------------------------------------------------------|
| Marcuk et al. (1971), [37]<br>Pakistan/USSR                                                                                             | N* | U | Y | U | U | U | Y | Y | Y | Y | Y | Y | Y | *Patients allocated to phage or placebo groups on an alternate basis. |
| Bruttin & Brussow (2005), [20]<br>Switzerland<br>Single-centre, randomised, double-blinded, placebo-controlled safety trial<br>Reg: N/A | U  | Y | Y | U | U | Y | Y | Y | Y | Y | Y | Y | Y | -                                                                     |
| Rhoads et al. (2009), [21]<br>United States<br>Phase I randomised, double-blinded, placebo-controlled, safety trial<br>Reg: NCT00663091 | Y  | Y | Y | U | U | U | Y | Y | Y | Y | Y | Y | Y | -                                                                     |
| Wright et al. (2009), [19]<br>UK<br>Phase I/II randomised, double-blinded, placebo-controlled, safety trial<br>Reg: 2004-001691-39      | Y  | Y | Y | Y | Y | Y | Y | Y | Y | Y | Y | Y | Y | -                                                                     |
| Sarker et al. (2012), [22]<br>Bangladesh                                                                                                | U  | U | Y | U | U | U | Y | Y | Y | Y | Y | Y | Y | -                                                                     |

|                                                                                                                                                               |     |     |   |   |   |   |   |   |   |   |   |   |   |   |
|---------------------------------------------------------------------------------------------------------------------------------------------------------------|-----|-----|---|---|---|---|---|---|---|---|---|---|---|---|
| Single-centre, randomised, double-blinded, placebo-controlled safety trial<br><br>Reg: N/A                                                                    |     |     |   |   |   |   |   |   |   |   |   |   |   |   |
| McCallin <i>et al.</i> (2013), [23]<br><br>Bangladesh<br><br>Single-centre, randomised, double-blinded, placebo-controlled safety trial<br><br>Reg: N/A       | U   | Y   | Y | U | U | U | Y | Y | Y | Y | Y | Y | Y | - |
| Rose <i>et al.</i> (2014), [24]<br><br>Belgium<br><br>Investigator-driven clinical trial<br><br>Reg: N/A                                                      | N/A | N/A | Y | U | U | U | Y | Y | Y | Y | Y | Y | Y | - |
| Sarker <i>et al.</i> (2016), [25]<br><br>Bangladesh<br><br>Single-centre, randomised, double-blinded, placebo-controlled safety trial<br><br>Reg: NCT00937274 | Y   | Y   | Y | Y | Y | Y | Y | Y | Y | Y | Y | Y | Y | - |
| Sarker <i>et al.</i> (2017), [26]<br><br>Bangladesh                                                                                                           | U   | Y   | Y | U | U | U | Y | Y | Y | Y | Y | Y | Y | - |

|                                                                                                                                                             |   |   |   |   |   |    |   |   |   |   |   |   |   |                                                    |
|-------------------------------------------------------------------------------------------------------------------------------------------------------------|---|---|---|---|---|----|---|---|---|---|---|---|---|----------------------------------------------------|
| Single-centre, randomised, placebo-controlled phase I safety trial<br><br>Reg: N/A                                                                          |   |   |   |   |   |    |   |   |   |   |   |   |   |                                                    |
| McCallin <i>et al.</i> (2018), [27]<br><br>Bangladesh<br><br>Single-centre, randomised, placebo-controlled phase I safety trial<br><br>Reg: N/A             | Y | Y | Y | Y | Y | U  | Y | Y | Y | Y | Y | Y | Y | -                                                  |
| Jault <i>et al.</i> (2019), [28]<br><br>France & Belgium<br><br>Multi-centre, randomised, controlled, double-blind phase I/II trial<br><br>Reg: NCT02116010 | Y | Y | Y | Y | N | Y  | Y | Y | Y | Y | Y | Y | Y | -                                                  |
| Ooi <i>et al.</i> (2019), [29]<br><br>Australia<br><br>Phase I open-label, single-centre, multiple ascending dose trial<br><br>Reg: ACTRN12616000002482     | N | U | Y | U | U | U* | Y | Y | Y | Y | Y | Y | Y | *Endoscopy videos were scored by a blinded surgeon |
| Gindin <i>et al.</i> (2019), [17]<br><br>United States                                                                                                      | U | U | Y | Y | U | U  | Y | Y | Y | Y | Y | Y | Y | -                                                  |

|                                                                                                                                     |   |   |   |    |    |   |   |   |   |   |   |   |   |                                                               |
|-------------------------------------------------------------------------------------------------------------------------------------|---|---|---|----|----|---|---|---|---|---|---|---|---|---------------------------------------------------------------|
| Single-centre, randomised, double-blinded, placebo-controlled trial<br><br>Reg: NCT03269617                                         |   |   |   |    |    |   |   |   |   |   |   |   |   |                                                               |
| Leitner <i>et al.</i> (2021), [30]<br><br>Georgia<br><br>Randomised, placebo-controlled, double-blind trial<br><br>Reg: NCT03140085 | Y | Y | Y | Y* | Y* | Y | Y | Y | Y | Y | Y | Y | Y | *Phage and placebo were blinded, antibiotics were not blinded |
